# Supplementary material
Source: ML conference proceedings conference paper supplement (https://openreview.net/forum?id=TBYsGnnuP2A)
Supplement: supplementary_material [file attachment]

## Stage 1

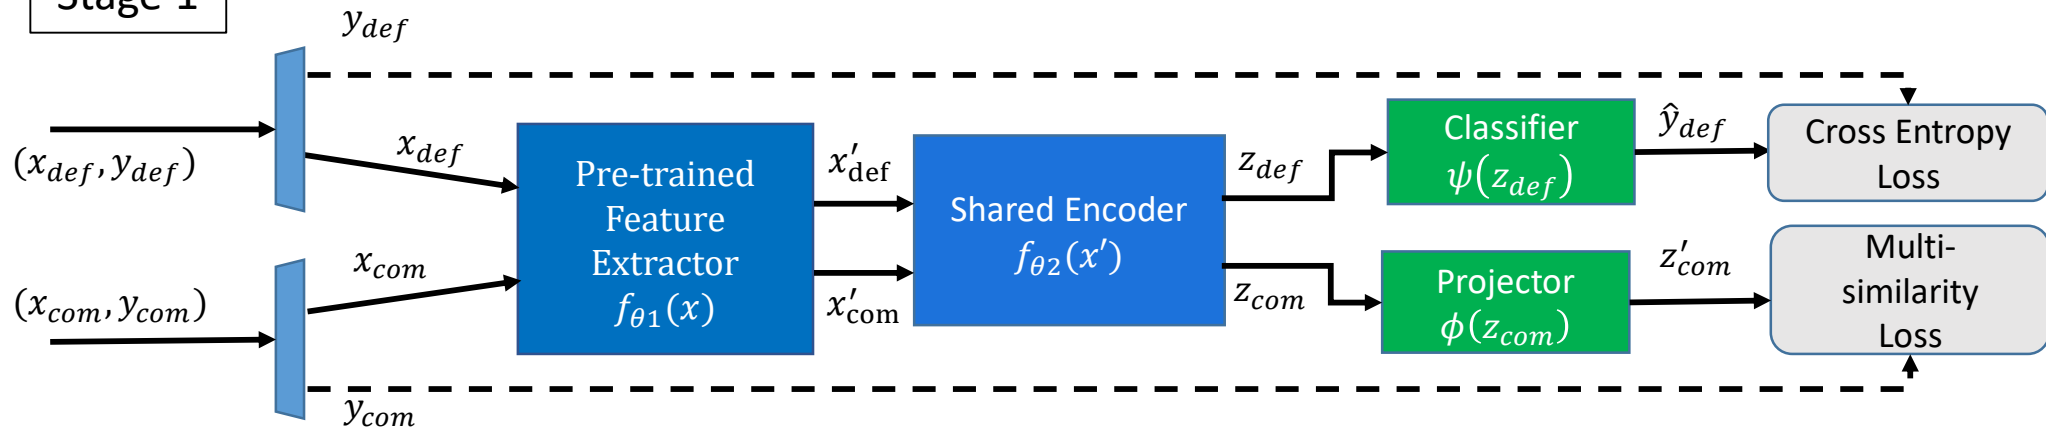

## Stage 2

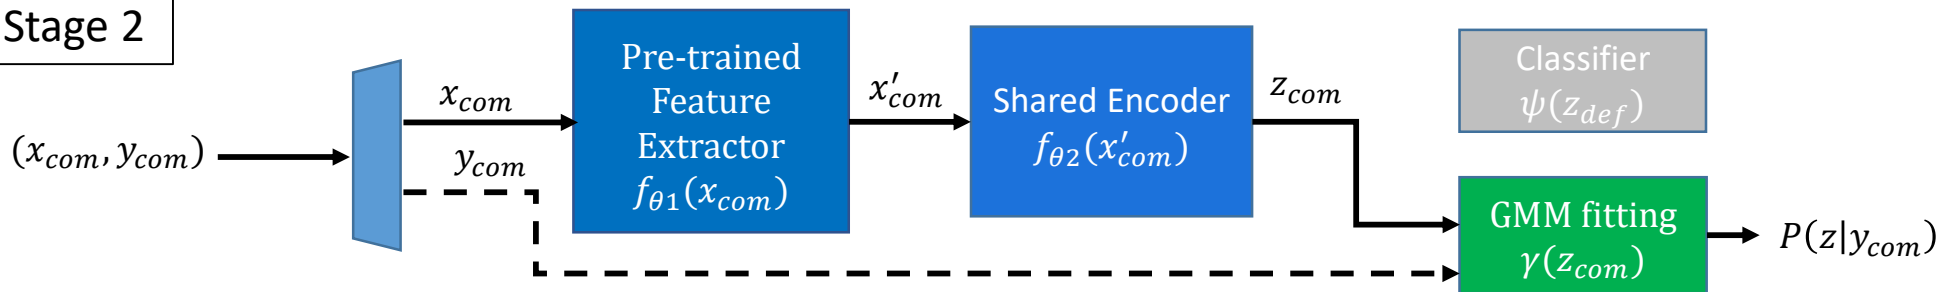

$x_{def} \in$  Training samples that are labeled as {Good, Bad/Missing, Bad/Stand, Bad/Shift, Bad/Short, Bad/Broken}

$x_{com} \in$  Training samples that are labeled as {Good, Bad/Missing, Bad/Stand}
