# Supplementary material
Source: ML conference proceedings conference paper supplement (https://openreview.net/forum?id=TBYsGnnuP2A)

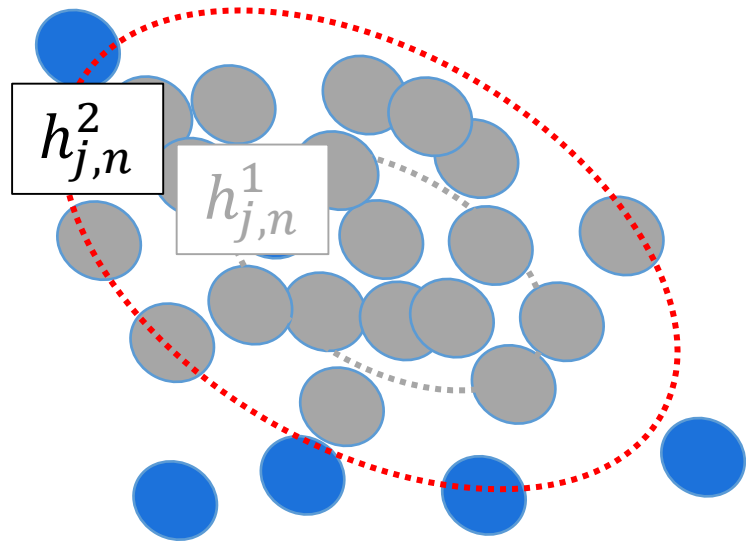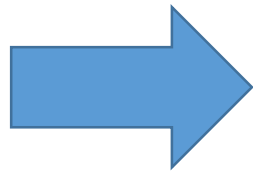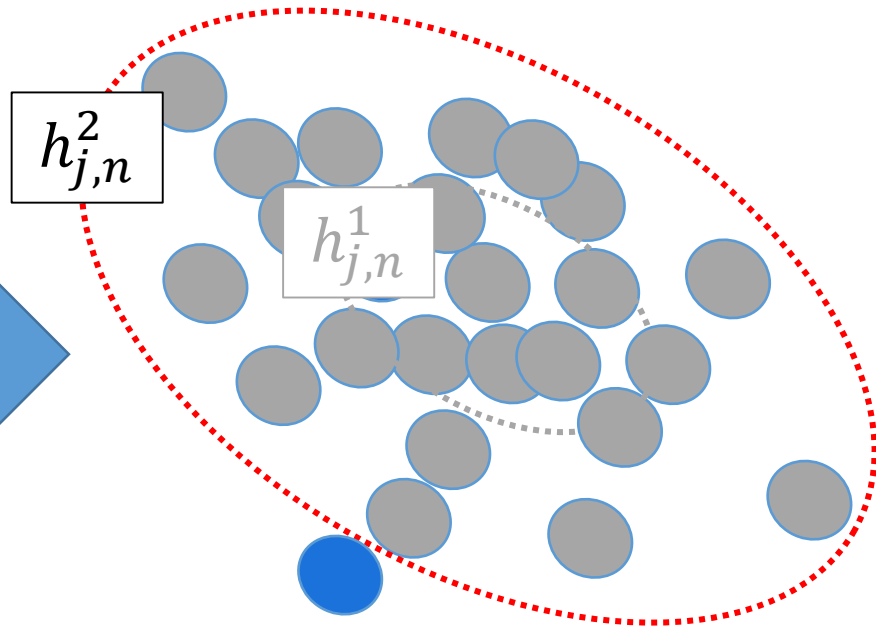

Supplement: supplementary_material [file attachment]

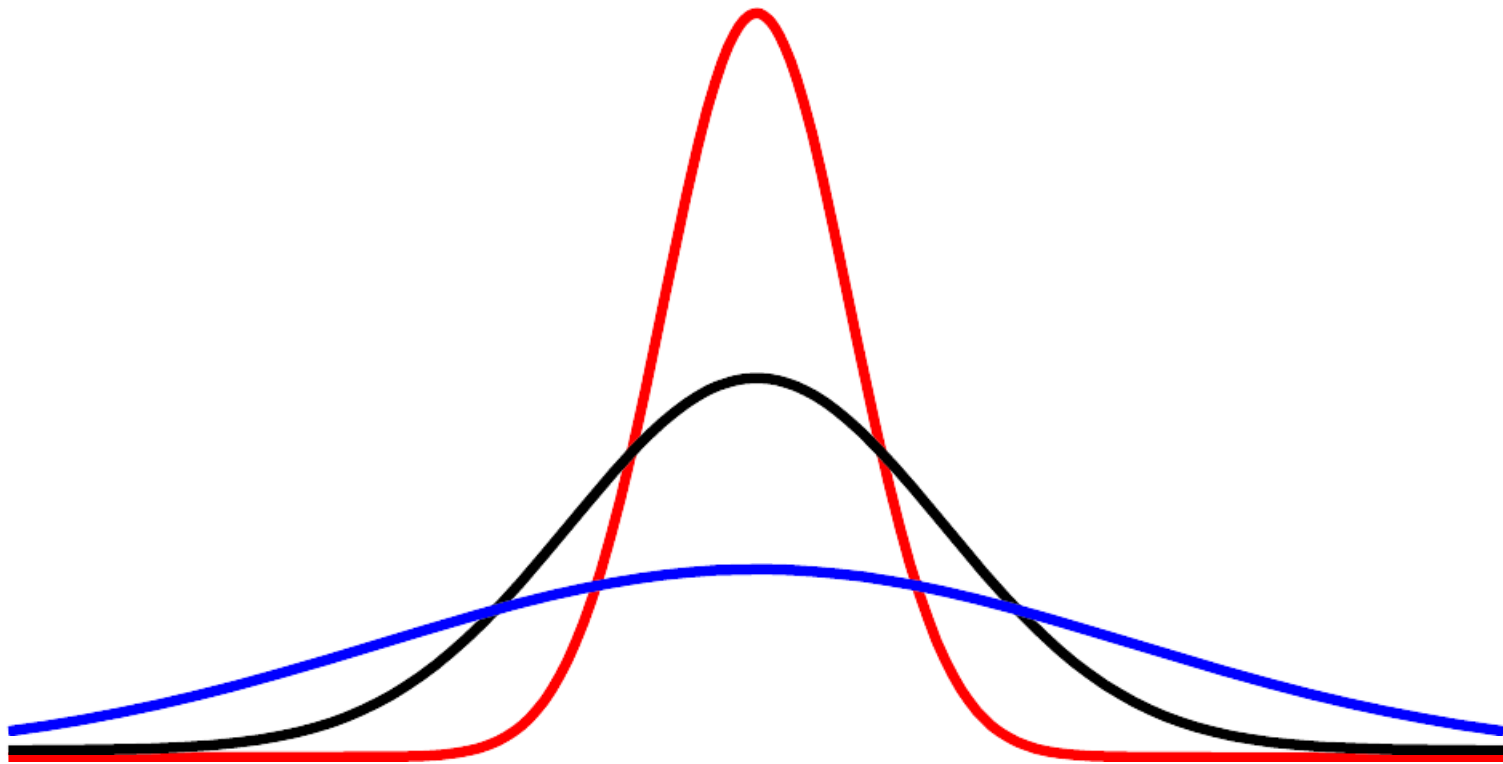

Supplement: supplementary_material [file attachment]

● Good test sample  
✕ Bad test sample

● missing  
● stand

Missing

Stand

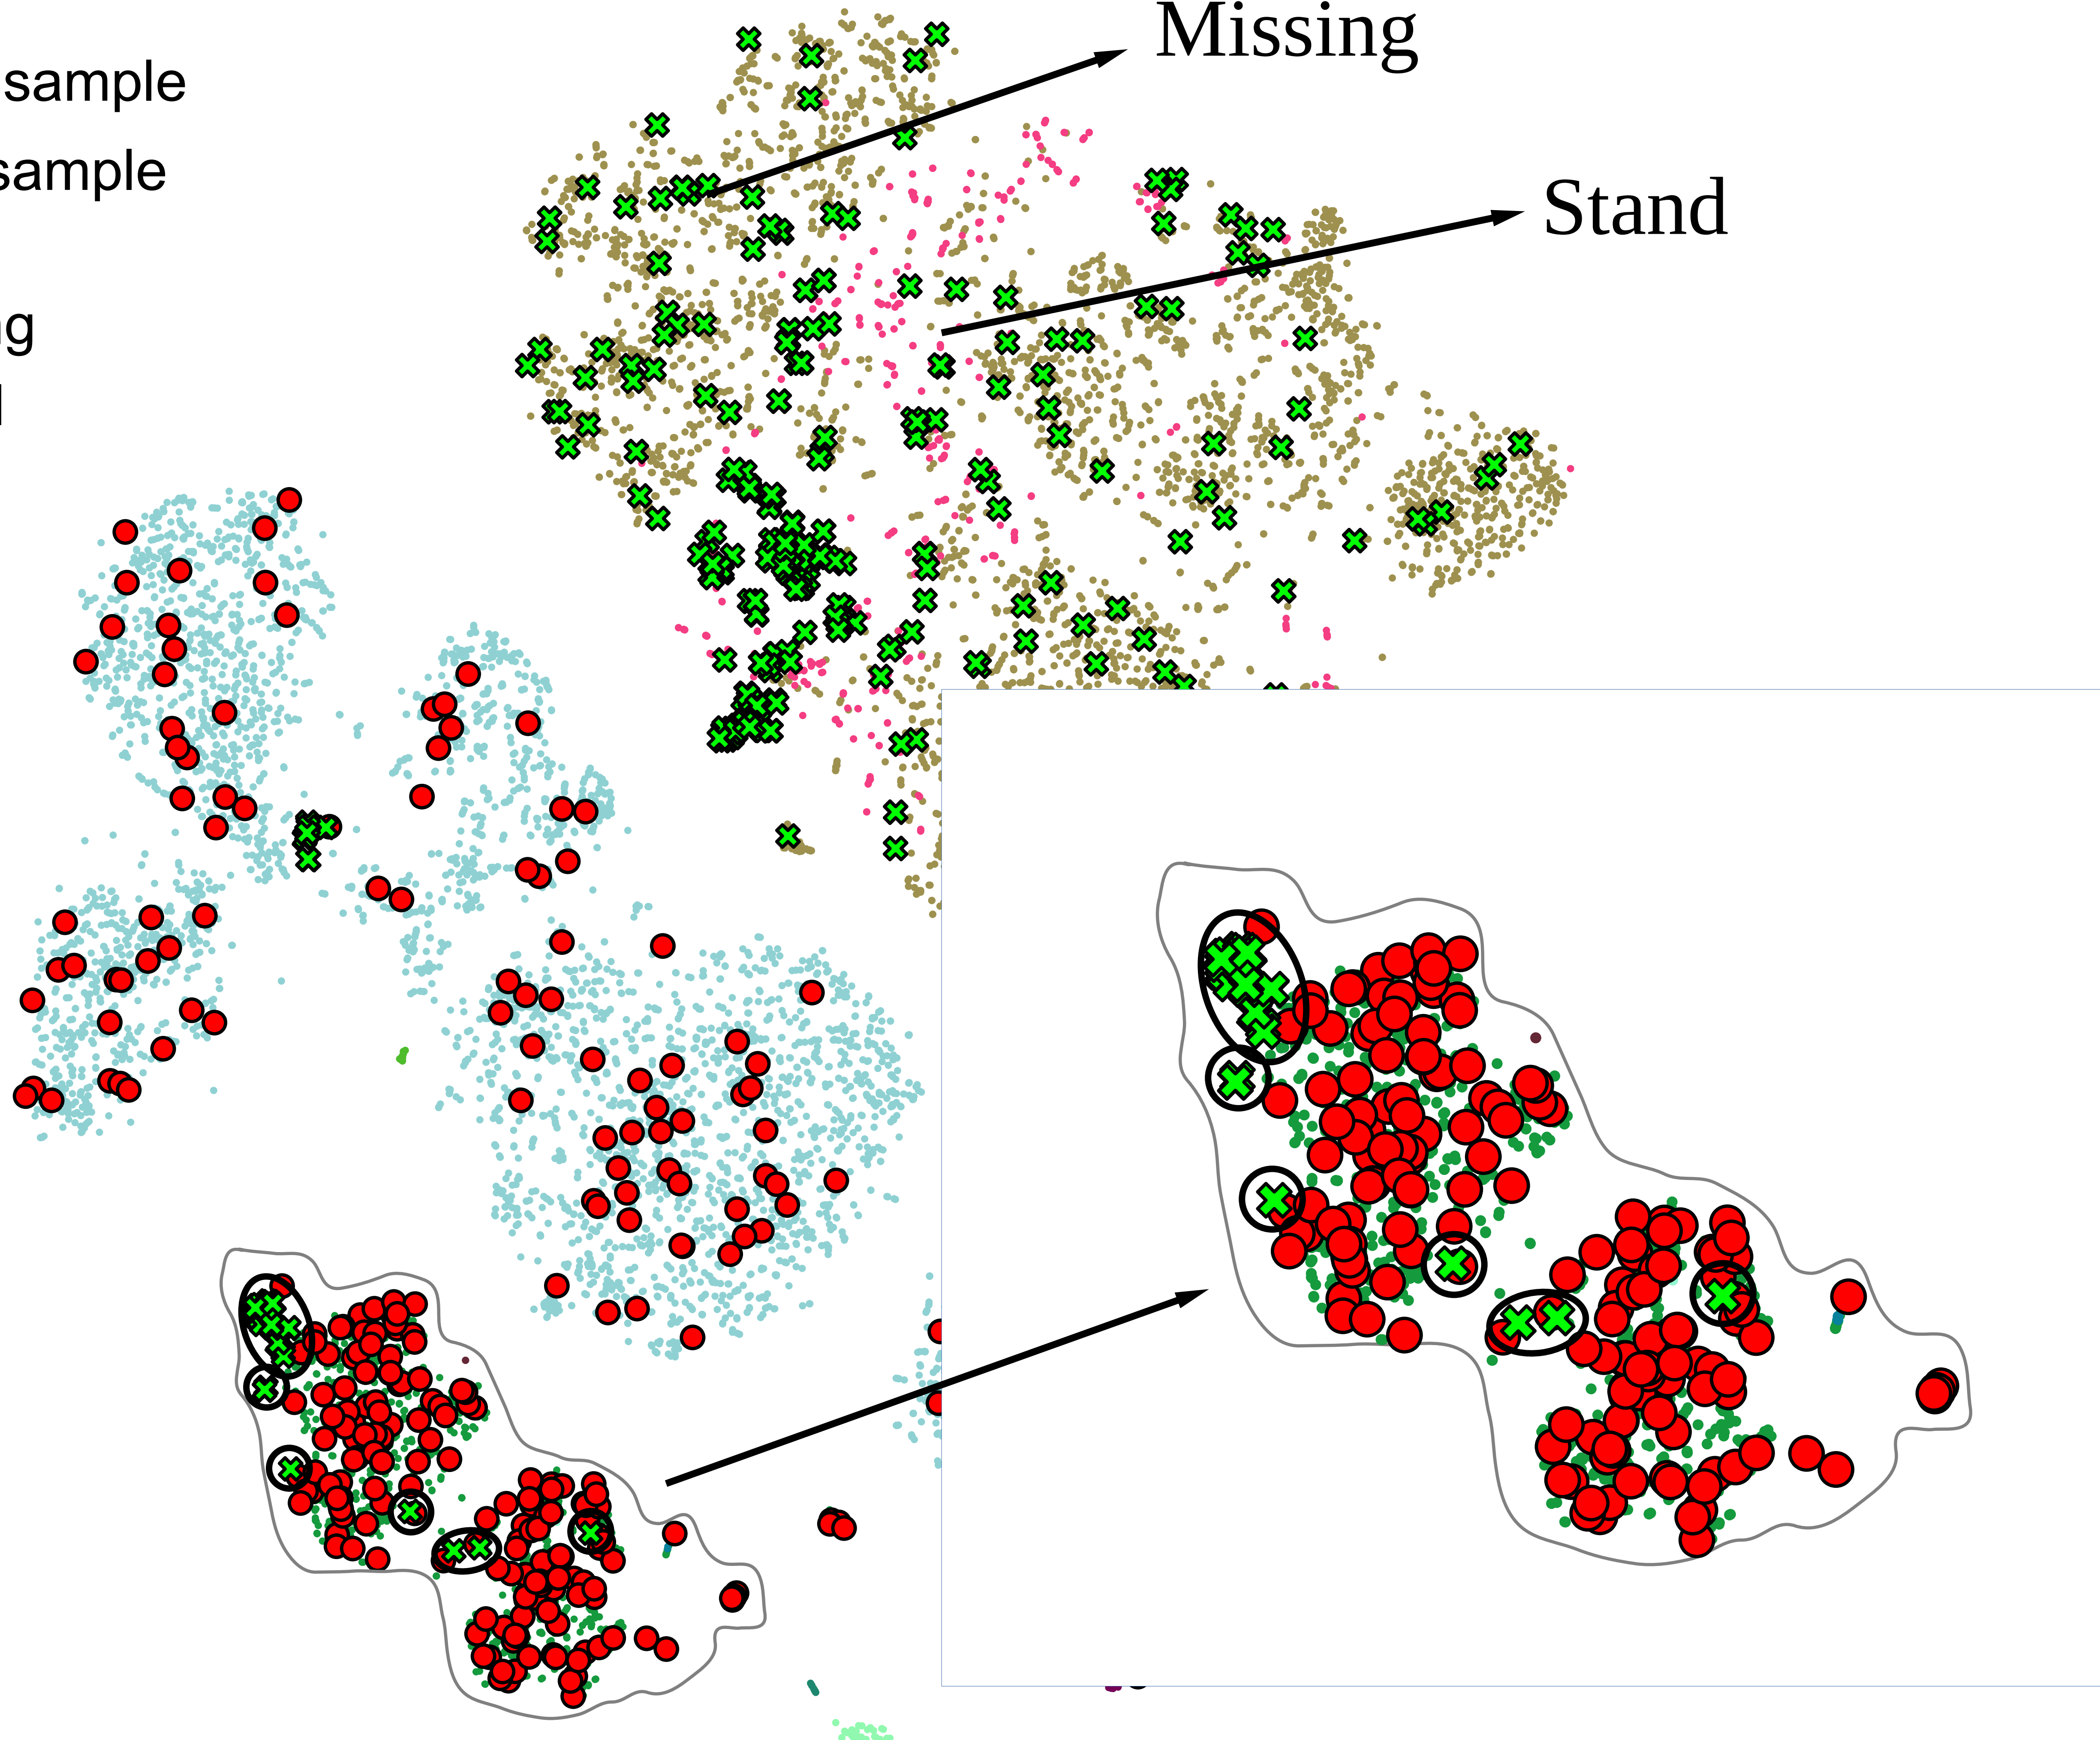

Supplement: supplementary_material [file attachment]

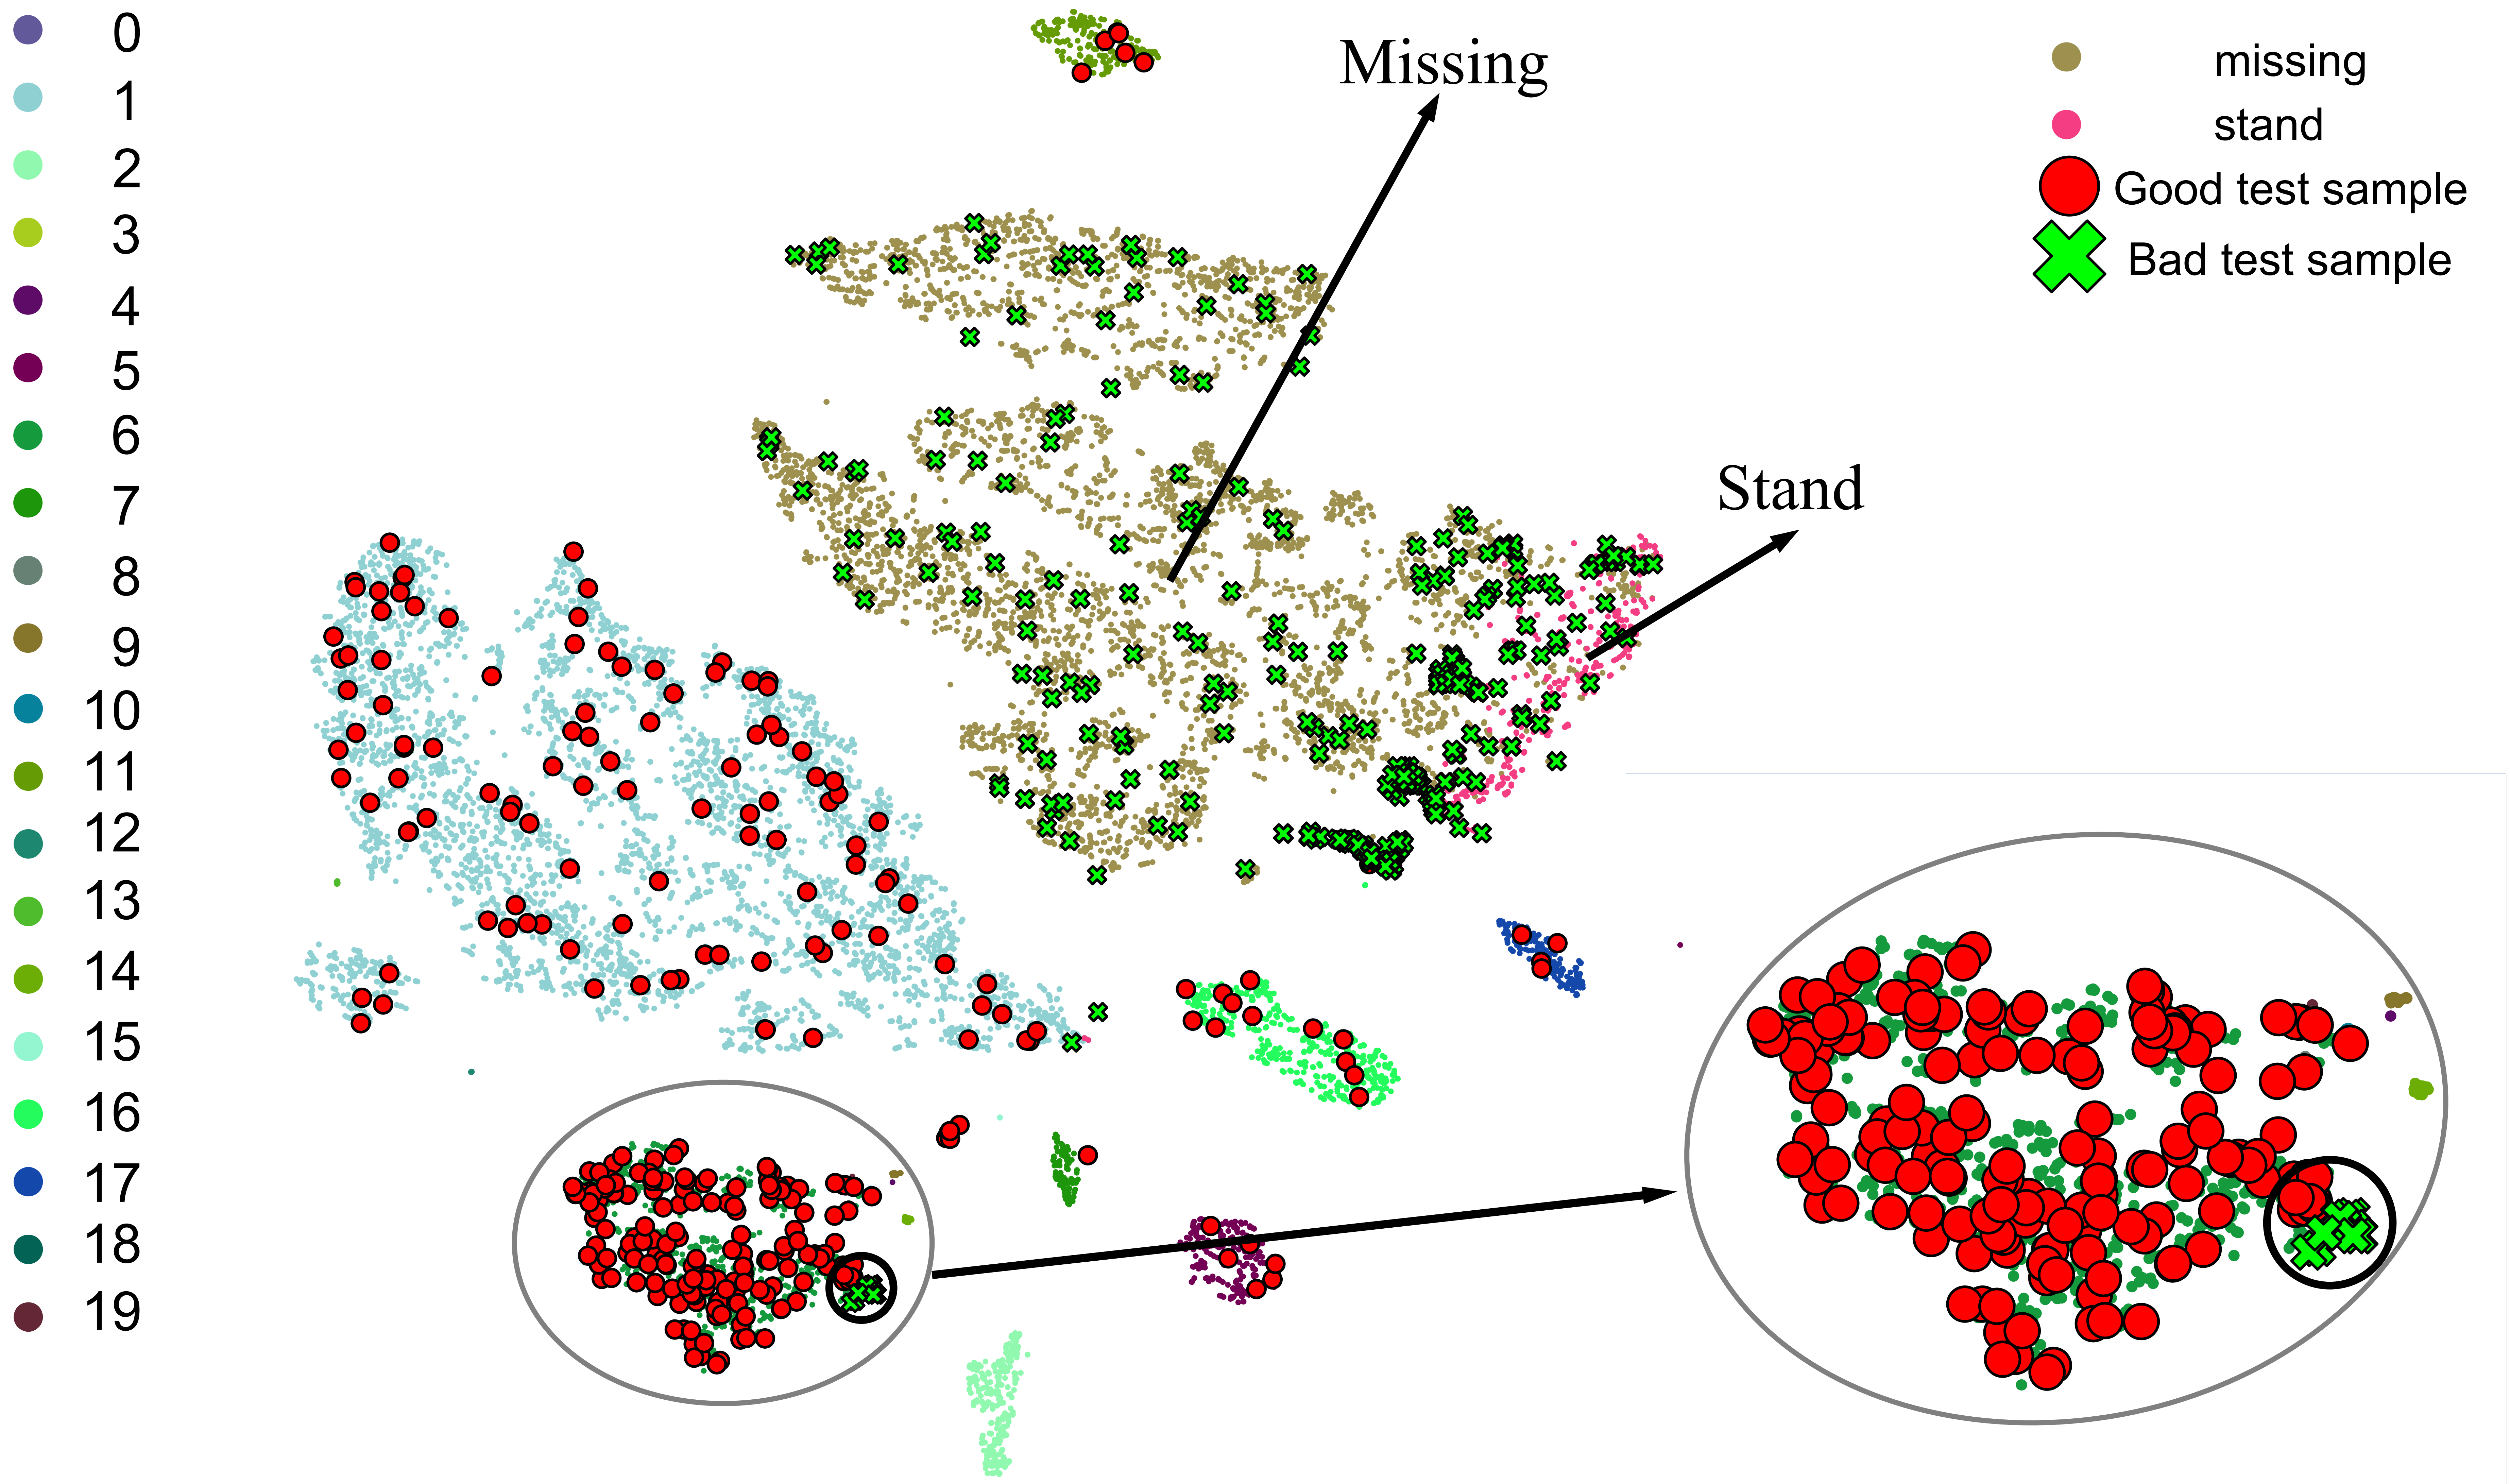

Supplement: supplementary_material [file attachment]

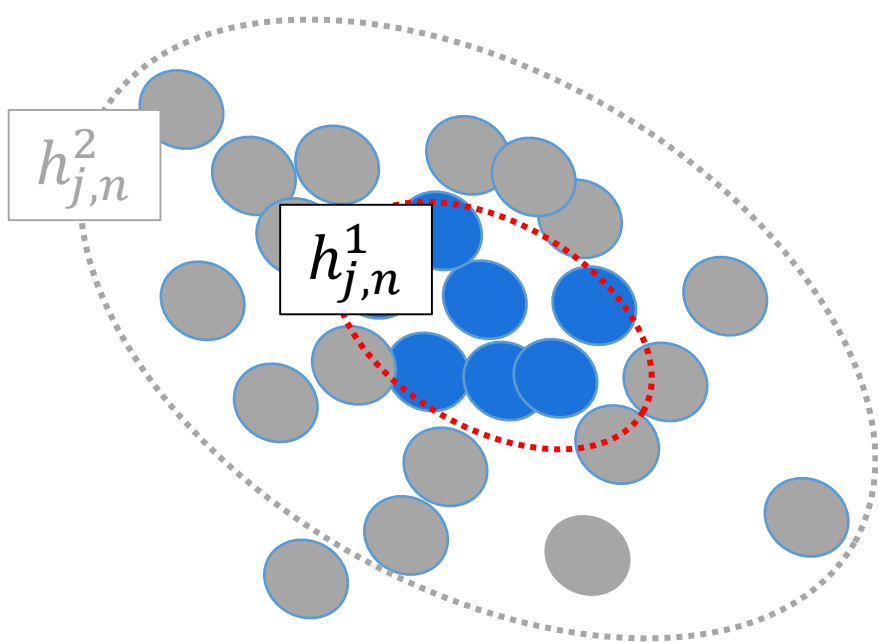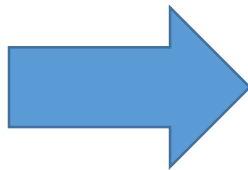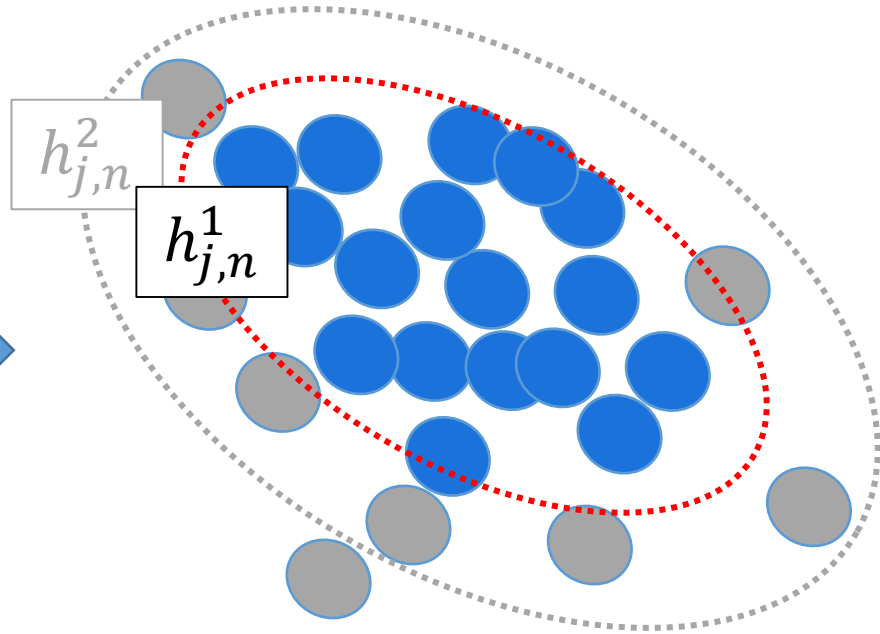

Supplement: supplementary_material [file attachment]

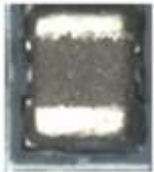

Good

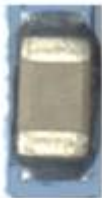

Good

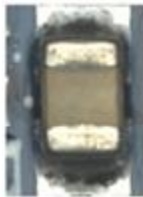

Good

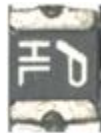

Good

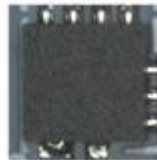

Good

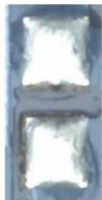

Bad/Missing

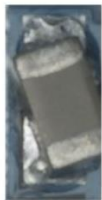

Bad/Shift

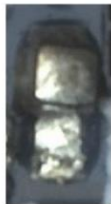

Bad/Stand

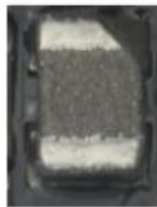

Bad/Broken

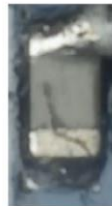

Bad/Short

Supplement: supplementary_material [file attachment]

Stand

Missing

- missing
- stand
- Good test sample
- Bad test sample

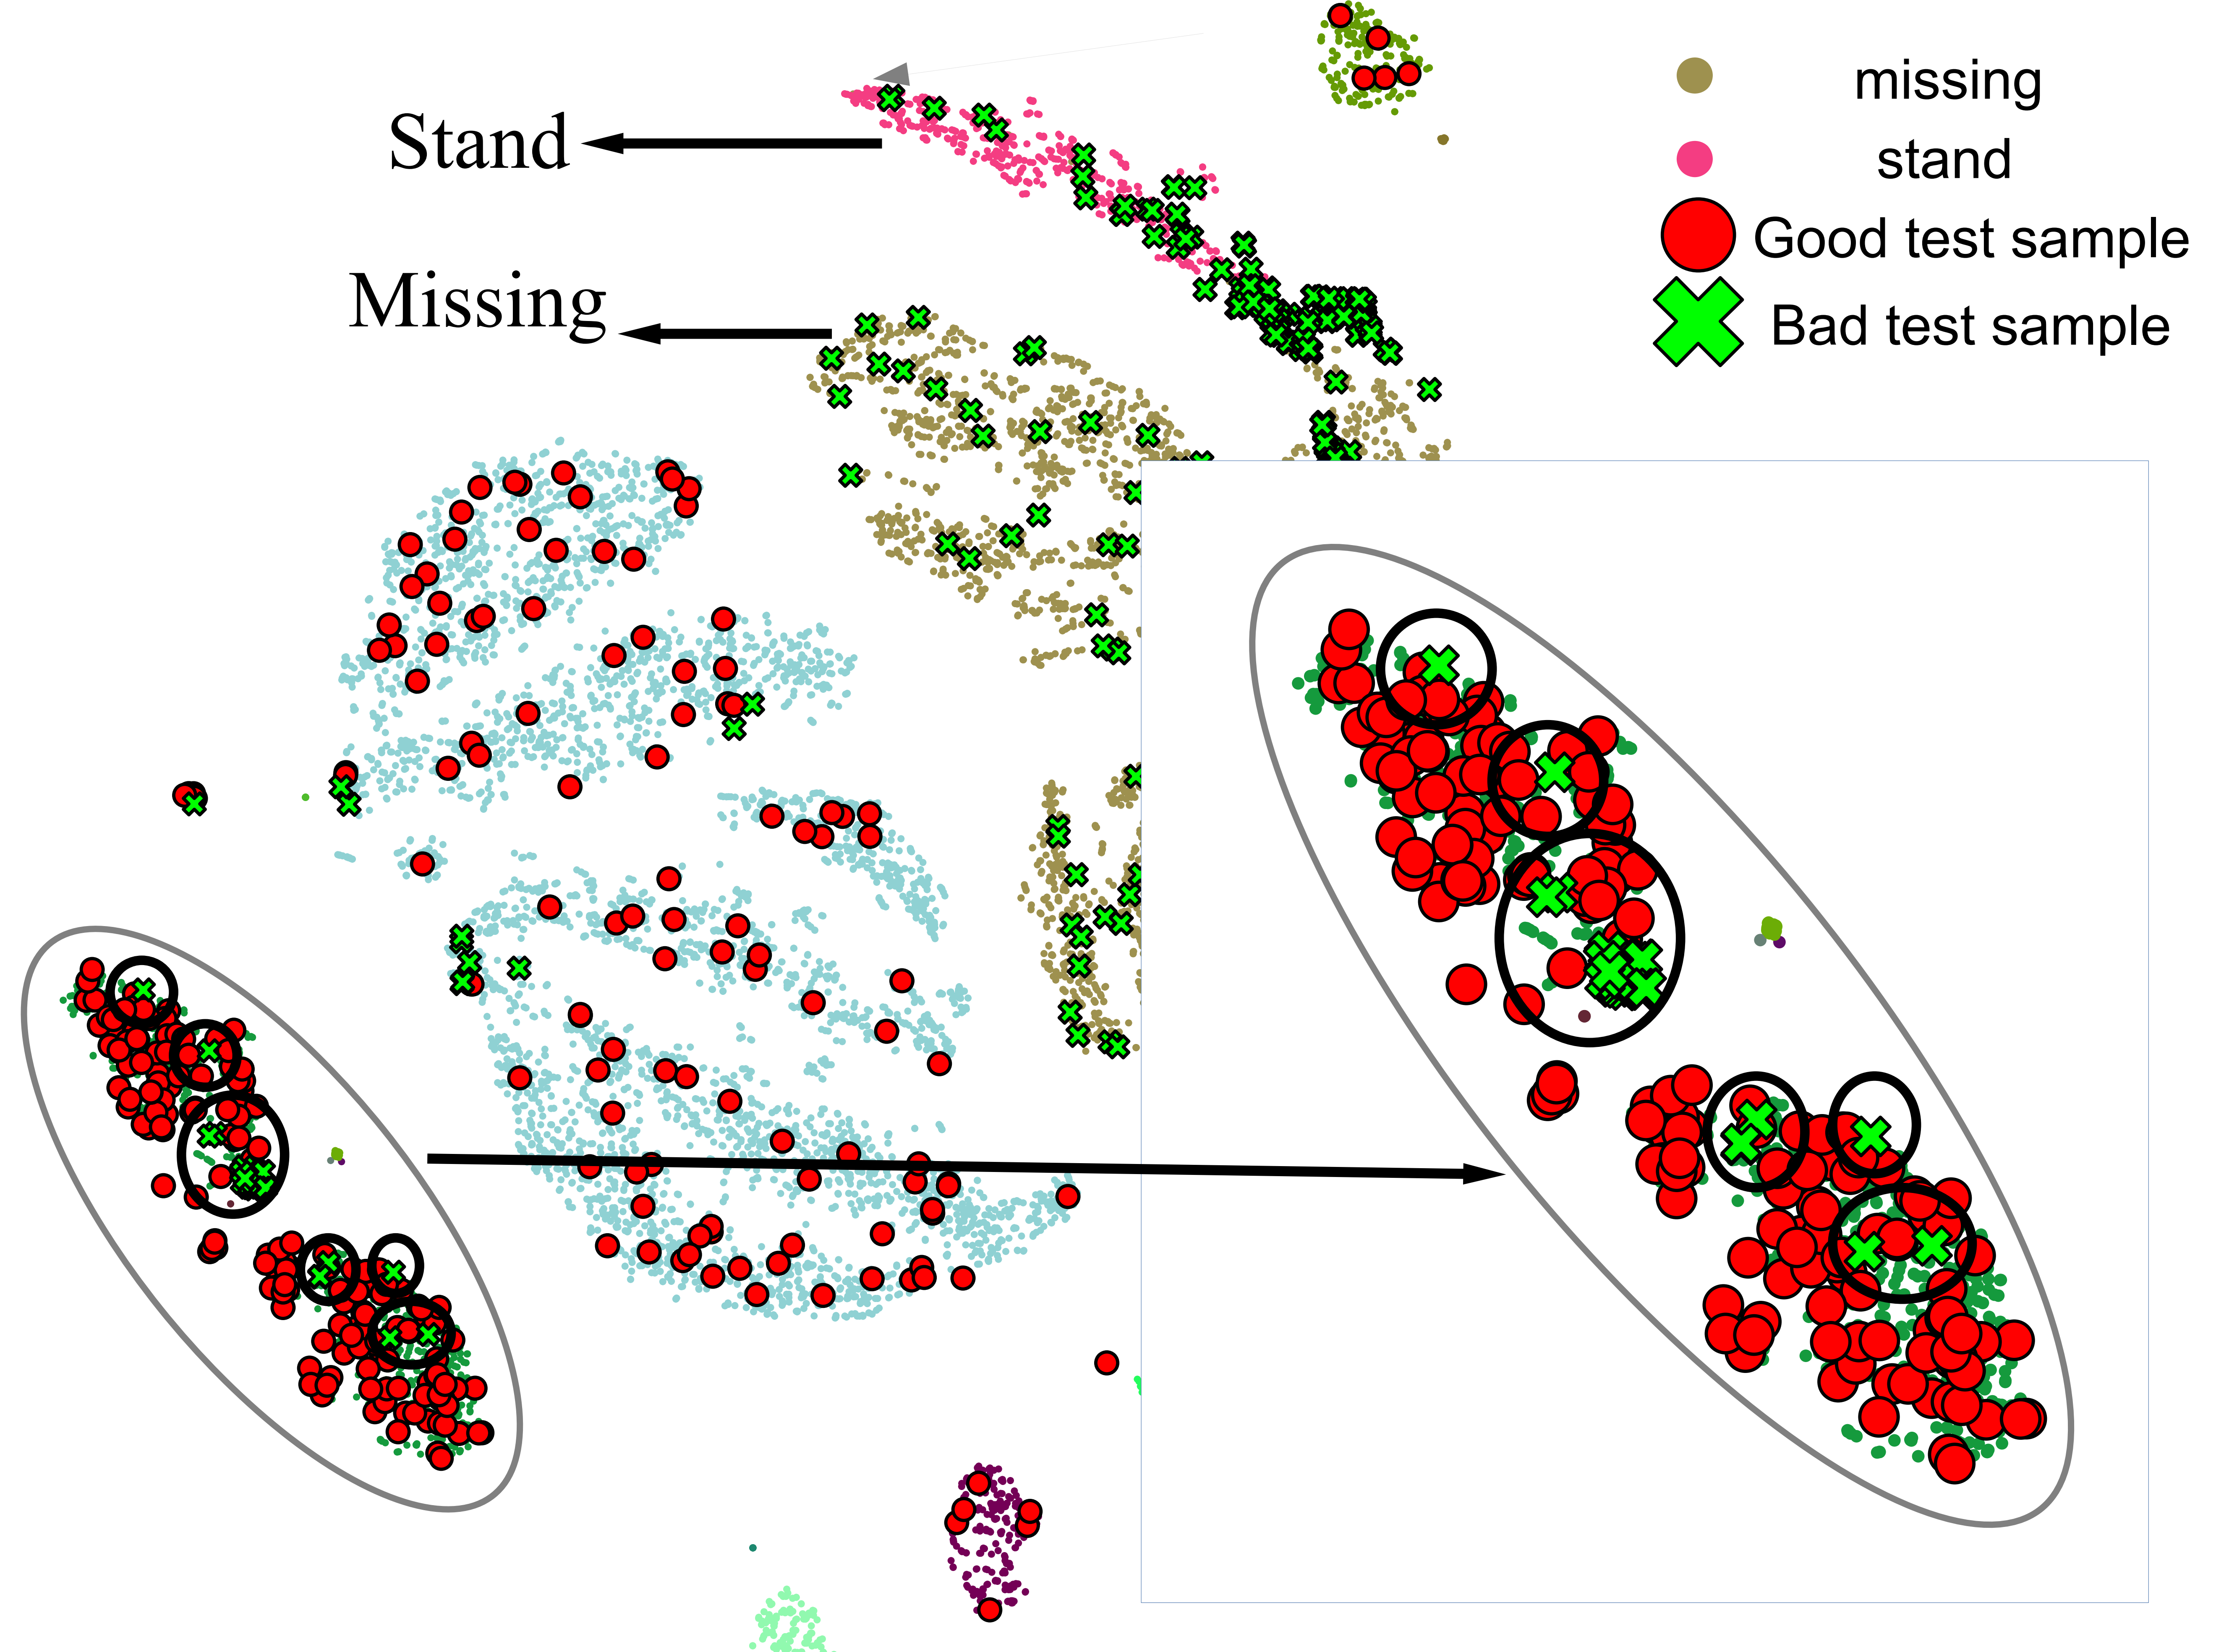

Supplement: supplementary_material [file attachment]
